# Supplementary material
Source: HighWire-hosted journal article supplement (https://cmaj.ca/highwire/filestream/74003/field_highwire_adjunct_files/1/190219-res-2-at.pdf)
Supplement: 190219-res-2-at.pdf [file 190219-res-2-at.pdf]

Now I want to ask you some questions about the characteristics of your household

|      |                                                                                                                                                                                                                                                                                                                                                                 |              |
|------|-----------------------------------------------------------------------------------------------------------------------------------------------------------------------------------------------------------------------------------------------------------------------------------------------------------------------------------------------------------------|--------------|
| 115  | What is the main material of the walls? <i>Select one</i><br>(1) No walls (2) Natural materials (cane, wood, mud) (3) Planks<br>(4) Stone with mud (5) Stone with cement/bricks (6) Other                                                                                                                                                                       | _            |
| 116  | What is the main floor material? <i>Select one</i><br>(1) Natural floor (earth/sand/dung)<br>(2) Rudimentary floor (wood/palm/bamboo)<br>(3) Finished floor (Polished wood, vinyl, tiles, cement, carpet)                                                                                                                                                       | _            |
| 117  | What is the main material of the roof: <i>Select one</i><br>(1) Iron sheets or tiles; (2) Thatch/grass or leaves; (3) Other                                                                                                                                                                                                                                     | _            |
| 118  | What kind of toilet facilities does your household have? <i>Select one</i><br>(1) Flush toilet (2) Pit toilet/latrine (3) No facility/bush/field                                                                                                                                                                                                                | _            |
| 119  | What is the main source of drinking water for members of your household? <i>Select one</i><br>(1) Piped water into dwelling; (2) Piped water into compound;<br>(3) Public tap; (4) Borehole (5) Dug well (6) Water from protected spring;<br>(7) Tanker truck; (8) Surface water (river/dam/lake ect); (9) Bottled water;<br>(10) unprotected spring (11) other | _            |
| 120  | What type of fuel does your household mainly use for cooking<br><i>Select one</i> (1) Electricity; (2) Gas; (3) Kerosene; (4) Charcoal;<br>(5) Firewood/straw; (6) Dung; (7) Other                                                                                                                                                                              | _            |
| 121  | Is the house connected to electricity<br>(1) yes (2) no                                                                                                                                                                                                                                                                                                         | _            |
|      | In this household is there anyone who owns:                                                                                                                                                                                                                                                                                                                     | (1)yes (2)no |
| 122  | Fridge                                                                                                                                                                                                                                                                                                                                                          | _            |
| 123  | TV                                                                                                                                                                                                                                                                                                                                                              | _            |
| 124  | Radio                                                                                                                                                                                                                                                                                                                                                           | _            |
| 125  | Bicycle                                                                                                                                                                                                                                                                                                                                                         | _            |
| 126  | Mobile phone                                                                                                                                                                                                                                                                                                                                                    | _            |
| 127  | A bed                                                                                                                                                                                                                                                                                                                                                           | _            |
| 128  | A kerosene lamp/pressure lamp                                                                                                                                                                                                                                                                                                                                   | _            |
| 129  | Wrist watch                                                                                                                                                                                                                                                                                                                                                     | _            |
| 129a | Table                                                                                                                                                                                                                                                                                                                                                           | _            |
| 129b | Chair                                                                                                                                                                                                                                                                                                                                                           | _            |
| 129c | Car or truck                                                                                                                                                                                                                                                                                                                                                    | _            |
| 129d | Motorcycle/scooter                                                                                                                                                                                                                                                                                                                                              | _            |
| 129e | None of these                                                                                                                                                                                                                                                                                                                                                   | _            |

|                                  |                                                                                                                                                             |        |
|----------------------------------|-------------------------------------------------------------------------------------------------------------------------------------------------------------|--------|
| 130                              | In this house are there chickens? How many?<br>(write the number; write 0 if none, 999 if respondent does not know)                                         | _    _ |
| 131                              | Do you have animals in this household like goat, sheep, cattle or<br>horses/donkeys/mules<br>How many? (write the number; 0 if none, 999 if does not know). | _    _ |
| 132                              | How many mosquito nets does your household have?<br>(Write total number Count those in use plus those not in use                                            | _    _ |
| <b>End of Module 1 interview</b> |                                                                                                                                                             |        |

Module 2: Women's module: health now

**All resident women aged 13-49 years**

**Interviewer:** When you have identified the next woman for interview you must first complete the consent procedure (upto 205) before proceeding with interview.

|     |                                                                                                                                                                                                                                       |                               |
|-----|---------------------------------------------------------------------------------------------------------------------------------------------------------------------------------------------------------------------------------------|-------------------------------|
| 200 | <b>PDA lookup</b> <i>Select name of woman from the list</i>                                                                                                                                                                           | _ _ _ _ _ _ _ _ _ _ _ _ _ _ _ |
| 201 | <b>PDA lookup:</b> <i>Confirm the ID number of the woman and write on her consent form (Cluster/household/person)</i>                                                                                                                 | _ _ _ _ / _ _ _ _ / _ _ _ _   |
| 202 | <b>Int:</b> <i>Is it possible to interview the woman?</i><br>1 = yes ( <b>SKIP TO 204</b> )<br>2 = No                                                                                                                                 | _                             |
| 203 | <b>Int:</b> <i>Why is it not possible to interview?</i><br>1= Temporarily absent – call back<br>2 = Travelled away<br>3=Sick<br>4 =Other<br><br><b>END OF PROCESS FOR THIS WOMAN – CONTINUE TO OTHER WOMEN 13-49 IN THE HOUSEHOLD</b> | _                             |
| 204 | <b>Int:</b> Have you read her the consent form?<br>(1) yes<br>(2) no                                                                                                                                                                  | _                             |
| 205 | <b>Int:</b> Does the woman agree?<br><br>(1)yes (2)no <b>IF NO, END INTERVIEW HERE – CONTINUE TO OTHER WOMEN 13-49 IN THE HOUSEHOLD</b>                                                                                               | _                             |

Now I would like to ask you some questions about the health care available to you

|     |                                                                                                                                                                                                                               |                         |
|-----|-------------------------------------------------------------------------------------------------------------------------------------------------------------------------------------------------------------------------------|-------------------------|
| 206 | Is there a health post in your kebele?<br>(1)Yes (2)No                                                                                                                                                                        | _                       |
| 207 | How long does it take you to walk to the nearest health post?<br><i>Record the time in minutes. If she doesn't know, record 99</i>                                                                                            | _ _ _                   |
| 208 | How many times have you visited the health post in the last six months?<br><i>Record the number of times</i><br><b>If any visits in last 6 months, skip to 215</b>                                                            | _                       |
|     | <b>If never in the last 6 months:</b> What are the reasons why you have not visited the health post in the last six months? ( <b>do not read out list, prompt, 'anything else'; select all that apply. Then skip to 217</b> ) | (1)yes<br>(2)no         |
| 209 | No illness in the family/no births                                                                                                                                                                                            | _                       |
| 210 | Health post is too far away                                                                                                                                                                                                   | _                       |
| 211 | Costs too much money to go to health post                                                                                                                                                                                     | _                       |
| 212 | Not enough time to visit                                                                                                                                                                                                      | _                       |
| 213 | Poor services available at the health post                                                                                                                                                                                    | _                       |
| 214 | Other                                                                                                                                                                                                                         | _                       |
| 215 | When was the last time you visited that health post?<br><i>Enter date, dd/mm/yyyy (don't know date 99/99/9999)</i>                                                                                                            | _ _ _ / _ _ _ / _ _ _ _ |

|     |                                                                                                                                                                                                                                                                                                                                                                                                                                                                 |                           |
|-----|-----------------------------------------------------------------------------------------------------------------------------------------------------------------------------------------------------------------------------------------------------------------------------------------------------------------------------------------------------------------------------------------------------------------------------------------------------------------|---------------------------|
| 216 | The last time you visited the health post, what was the primary reason?<br><i>Select one</i><br>1 Family planning; 2 Child immunisation; 3 Antenatal care;<br>4 Delivery ; 5 Postnatal care; 6 Care for a baby;<br>7 Health education; 8 Growth monitoring; 9 Referral of sick child;<br>10 Diarrhea treatment; 11 Malaria treatment; 12 Pneumonia treatment;<br>13 Other treatment of sickness; 14 Obtain or buy mosquito nets; 15 Other reason (not sickness) | _                         |
| 217 | Is there a Health center in your kebele?<br>(1)Yes (2)No                                                                                                                                                                                                                                                                                                                                                                                                        | _                         |
| 218 | How long does it take you to walk to the nearest Health center?<br><i>Record the time in minutes. If she doesn't know, record 99</i>                                                                                                                                                                                                                                                                                                                            | _ _ _ _                   |
| 219 | How many times have you visited the Health center in the last 6 months?<br><i>Record the number of times If any visits in last 6 months, skip to 226</i>                                                                                                                                                                                                                                                                                                        | _                         |
|     | <b>If never in the last 6 months:</b><br><br>What are the reasons why you have not visited the Health center in the last six months? <b>(do not read out list, prompt, 'anything else'; select all that apply). Then skip to 228</b>                                                                                                                                                                                                                            |                           |
| 220 | No illness in the family/no births                                                                                                                                                                                                                                                                                                                                                                                                                              | _                         |
| 221 | Health facility is too far away                                                                                                                                                                                                                                                                                                                                                                                                                                 | _                         |
| 222 | Costs too much money to go to health post                                                                                                                                                                                                                                                                                                                                                                                                                       | _                         |
| 223 | Not enough time to visit                                                                                                                                                                                                                                                                                                                                                                                                                                        | _                         |
| 224 | Poor services available at the health facility                                                                                                                                                                                                                                                                                                                                                                                                                  | _                         |
| 225 | Other (specify)                                                                                                                                                                                                                                                                                                                                                                                                                                                 | _                         |
| 226 | When was the last time you visited that Health center?<br><i>Enter date, dd/mm/yyyy (don't know date 99/99/9999</i>                                                                                                                                                                                                                                                                                                                                             | _ _ _ / _ _ _ / _ _ _ _ _ |
| 227 | The last time you visited the Health center, what was the primary reason?<br><i>Select one</i><br>1 Family planning; 2 Child immunisation; 3 Antenatal care;<br>4 Delivery care; 5 Postnatal care; 6 Care for a baby; 7 Health education;<br>8 Growth monitoring; 9 Referral of sick child; 10 Diarrhea treatment; 11 Malaria treatment; 12 Pneumonia treatment; 13 Other illness treatment 14 Obtain or buy mosquito nets; 15 Other reason (not sickness)      | _                         |
| 228 | Have you been visited at home during the past 6 months by a Health Extension Worker to talk about health related issues?<br>(1)Yes (2)No - <b>skip to 246</b>                                                                                                                                                                                                                                                                                                   | _                         |
| 229 | <b>If 228=yes</b><br><br>When was the last time the HEW visited you at home?                                                                                                                                                                                                                                                                                                                                                                                    | _ _ _ / _ _ _ / _ _ _ _ _ |
|     | Who did the HEW talk to the last time she visited you at home?<br><b>(do not read out the list, probe: 'anything else?'); (select all that apply)</b>                                                                                                                                                                                                                                                                                                           | (1)yes<br>(2)no           |
| 230 | Myself                                                                                                                                                                                                                                                                                                                                                                                                                                                          | _                         |
| 231 | Other adult woman                                                                                                                                                                                                                                                                                                                                                                                                                                               | _                         |

|      |                                                                                                                                                                                         |                                                                    |
|------|-----------------------------------------------------------------------------------------------------------------------------------------------------------------------------------------|--------------------------------------------------------------------|
| 232  | Head of household                                                                                                                                                                       | <input type="checkbox"/>                                           |
| 233  | Other adult male                                                                                                                                                                        | <input type="checkbox"/>                                           |
|      | What was discussed the last time the HEW visited you at home? ( <b>do not read out the list but probe: 'anything else?'</b> ; <i>select all that apply</i> )                            | (1)yes<br>(2)no                                                    |
| 234  | Immunisation                                                                                                                                                                            | <input type="checkbox"/>                                           |
| 235  | Child nutrition                                                                                                                                                                         | <input type="checkbox"/>                                           |
| 236  | Family planning                                                                                                                                                                         | <input type="checkbox"/>                                           |
| 237  | Pregnancy care                                                                                                                                                                          | <input type="checkbox"/>                                           |
| 238  | Delivery care                                                                                                                                                                           | <input type="checkbox"/>                                           |
| 239  | Newborn care                                                                                                                                                                            | <input type="checkbox"/>                                           |
| 240  | Post natal care                                                                                                                                                                         | <input type="checkbox"/>                                           |
| 241  | Information about HIV/AIDS                                                                                                                                                              | <input type="checkbox"/>                                           |
| 242  | Information on hygiene                                                                                                                                                                  | <input type="checkbox"/>                                           |
| 243  | Diarrhea treatment                                                                                                                                                                      | <input type="checkbox"/>                                           |
| 244  | Promotion of latrine use                                                                                                                                                                | <input type="checkbox"/>                                           |
| 245  | Promotion of safe water use                                                                                                                                                             | <input type="checkbox"/>                                           |
| 245a | Promotion of long lasting insecticide bednets (LLINs)                                                                                                                                   | <input type="checkbox"/>                                           |
| 245b | None of these                                                                                                                                                                           | <input type="checkbox"/>                                           |
| 246  | Are you aware of community health volunteers who visit people at home to talk about health issues?<br><br>(1)Yes (2)No <b>skip to 274</b>                                               | <input type="checkbox"/>                                           |
|      | Can you tell me all the types of community health volunteers you know about in your kebele? <i>Select all mentioned</i>                                                                 | (1)yes<br>(2)no                                                    |
| 247  | CHP                                                                                                                                                                                     | <input type="checkbox"/>                                           |
| 248  | HDA                                                                                                                                                                                     | <input type="checkbox"/>                                           |
| 249  | Environmental health agents                                                                                                                                                             | <input type="checkbox"/>                                           |
| 250  | TBA                                                                                                                                                                                     | <input type="checkbox"/>                                           |
| 251  | Other                                                                                                                                                                                   | <input type="checkbox"/>                                           |
| 252  | Don't know cadre                                                                                                                                                                        | <input type="checkbox"/>                                           |
| 253  | Have you been visited at home during the past 6 months by any Community Health volunteer to talk about health related issues? Probe: CHP, HDA, others (1)Yes (2)No – <b>skip to 274</b> | <input type="checkbox"/>                                           |
| 254  | <b>If yes</b><br>When was the last time the volunteer visited you at home?<br><i>Enter date don't know date enter 99/99/9999</i>                                                        | <input type="text"/> / <input type="text"/> / <input type="text"/> |
| 255  | What type of volunteer was it? (1) CHP, (2) HDA, (3) Environmental health agent, (4) TBA (5) Other (specify) (6)Don't know cadre                                                        | <input type="checkbox"/>                                           |

|      |                                                                                                                                                                                                                     |                          |
|------|---------------------------------------------------------------------------------------------------------------------------------------------------------------------------------------------------------------------|--------------------------|
| 256  | Specify                                                                                                                                                                                                             |                          |
| 257  | What gender was that volunteer<br>(1) male (2) female                                                                                                                                                               | <input type="checkbox"/> |
|      | Who did the volunteer talk to at that last visited to your home?<br><b>(do not read out the list, probe: 'anything else?'; select all that apply)</b>                                                               | (1)yes<br>(2)no          |
| 258  | Myself                                                                                                                                                                                                              | <input type="checkbox"/> |
| 259  | Other adult woman                                                                                                                                                                                                   | <input type="checkbox"/> |
| 260  | Head of household                                                                                                                                                                                                   | <input type="checkbox"/> |
| 261  | Other adult male                                                                                                                                                                                                    | <input type="checkbox"/> |
|      | What was discussed the last time the volunteer visited you at home? <b>(do not read out the list but probe: 'anything else?'; select all that apply)</b>                                                            | (1)yes<br>(2)no          |
| 262  | Immunisation                                                                                                                                                                                                        | <input type="checkbox"/> |
| 263  | Child nutrition                                                                                                                                                                                                     | <input type="checkbox"/> |
| 264  | Family planning                                                                                                                                                                                                     | <input type="checkbox"/> |
| 265  | Pregnancy care                                                                                                                                                                                                      | <input type="checkbox"/> |
| 266  | Delivery care                                                                                                                                                                                                       | <input type="checkbox"/> |
| 267  | Newborn care                                                                                                                                                                                                        | <input type="checkbox"/> |
| 268  | Post natal care                                                                                                                                                                                                     | <input type="checkbox"/> |
| 269  | Information about HIV/AIDS                                                                                                                                                                                          | <input type="checkbox"/> |
| 270  | Information on hygiene                                                                                                                                                                                              | <input type="checkbox"/> |
| 271  | Diarrhea treatment                                                                                                                                                                                                  | <input type="checkbox"/> |
| 272  | Promotion of latrine use                                                                                                                                                                                            | <input type="checkbox"/> |
| 273  | Promotion of safe water use                                                                                                                                                                                         | <input type="checkbox"/> |
| 273a | Promotion of long lasting insecticide bednets (LLINs)                                                                                                                                                               | <input type="checkbox"/> |
| 273b | None of these                                                                                                                                                                                                       | <input type="checkbox"/> |
| 274  | Have you attended any meetings in your community (outside your home) about health issues?<br>(1)Yes (2)No - <b>skip to 290</b>                                                                                      | <input type="checkbox"/> |
| 275  | <b>If yes:</b> When was the last meeting you attended outside your home?<br><i>Enter date dd/mm/yyyy (don't know date 99/99/9999)</i>                                                                               | _ _ / _ _ / _ _ _ _      |
| 276  | Who organised the last meeting?<br>(1) A community health volunteer (2) Kebele health team<br>(3) Health extension worker (4) Don't know-(5) Pregnant mothers forum<br><b>(1)-(5) go to 278) (6)Other (specify)</b> | <input type="checkbox"/> |
| 277  | Specify                                                                                                                                                                                                             |                          |
|      | What was discussed at the last community meeting you attended outside your home? <b>(do not read out the list but probe: 'anything else?'; select all mentioned)</b>                                                | (1)yes<br>(2)no          |
| 278  | Immunisation                                                                                                                                                                                                        | <input type="checkbox"/> |
| 279  | Child nutrition                                                                                                                                                                                                     | <input type="checkbox"/> |
| 280  | Family planning                                                                                                                                                                                                     | <input type="checkbox"/> |
| 281  | Pregnancy care                                                                                                                                                                                                      | <input type="checkbox"/> |

|      |                                                       |                          |
|------|-------------------------------------------------------|--------------------------|
| 282  | Delivery care                                         | <input type="checkbox"/> |
| 283  | Newborn care                                          | <input type="checkbox"/> |
| 284  | Post natal care                                       | <input type="checkbox"/> |
| 285  | Information about HIV/AIDS                            | <input type="checkbox"/> |
| 286  | Information on hygiene                                | <input type="checkbox"/> |
| 287  | Diarrhea treatment                                    | <input type="checkbox"/> |
| 288  | Promotion of latrine use                              | <input type="checkbox"/> |
| 289  | Promotion of safe water use                           | <input type="checkbox"/> |
| 289a | Promotion of long lasting insecticide bednets (LLINs) | <input type="checkbox"/> |
| 289b | None of these                                         | <input type="checkbox"/> |

Now I would like to ask you some questions about your health right now.

|     |                                                                                                                                                                                                                                              |                          |
|-----|----------------------------------------------------------------------------------------------------------------------------------------------------------------------------------------------------------------------------------------------|--------------------------|
| 290 | Have you ever been pregnant? (even if this did not lead to a live birth)<br>(1) Yes; (2) No                                                                                                                                                  | <input type="checkbox"/> |
| 291 | Are you currently pregnant? ( <b>Probe to make sure the respondent is giving you the correct answer</b> )<br>(1) Yes (2) No <b>SKIP TO 338</b>                                                                                               | <input type="checkbox"/> |
| 292 | <b>If yes</b> Which number pregnancy is this?<br>(write number)                                                                                                                                                                              | <input type="text"/>     |
| 293 | What gestation are you now?<br>(record no. weeks)                                                                                                                                                                                            | <input type="text"/>     |
| 294 | Do you have a family health card?<br>(1)yes (2)no ( <b>SKIP TO 296</b> )                                                                                                                                                                     | <input type="checkbox"/> |
| 295 | May I see your family health card?<br>(1)yes (2)no                                                                                                                                                                                           | <input type="checkbox"/> |
| 296 | Have you already received any care for your pregnancy so far this pregnancy? <b>Probe: care at the health post, at a health center, or visits at home from a HEW or community volunteer (CHP/HDA)</b><br>(1)Yes (2)No ( <b>SKIP TO 315</b> ) | <input type="checkbox"/> |
| 297 | Did you receive pregnancy care from a health post? (1)yes (2)no <b>If no, go to 303</b>                                                                                                                                                      | <input type="checkbox"/> |
| 298 | How many times have you attended the health post for pregnancy (antenatal) care this pregnancy? <i>Enter the number of times</i><br><b>Interviewer: record from card if available</b>                                                        | <input type="text"/>     |
| 299 | When did your first visit to the health post take place?<br><i>Enter date dd/mm/yyyy</i><br><b>Interviewer: record from FHC if available</b>                                                                                                 | <input type="text"/>     |
| 300 | How old was your pregnancy at the first visit? (record no. weeks)<br><b>Interviewer: record from FHC if available</b>                                                                                                                        | <input type="text"/>     |
| 301 | Who saw you at that first visit?<br>(1) HEW (2) Nurse (3) volunteer (4) other (specify)                                                                                                                                                      | <input type="checkbox"/> |
| 302 | Specify                                                                                                                                                                                                                                      | <input type="text"/>     |
| 303 | Did you receive pregnancy care from a health center? (1)yes (2)no <b>If no, go to 309</b>                                                                                                                                                    | <input type="checkbox"/> |



|      |                                                                                                                                                                                                      |                                                                    |
|------|------------------------------------------------------------------------------------------------------------------------------------------------------------------------------------------------------|--------------------------------------------------------------------|
| 304  | How many times have you attended the health center for pregnancy (antenatal) care this pregnancy? <i>Enter the number of times</i>                                                                   | <input type="text"/>                                               |
| 305  | When did your first visit to the health center take place? <i>(enter date)</i><br><b>Interviewer: record from FHC if available</b>                                                                   | <input type="text"/> / <input type="text"/> / <input type="text"/> |
| 306  | How old was your pregnancy at the first visit? <i>(record no. weeks)</i><br><b>Interviewer: record from FHC if available</b>                                                                         | <input type="text"/>                                               |
| 307  | Who saw you at that first visit?<br><i>(1) HEW (2) Nurse (3) volunteer (1)-(3) go to 309 (4) other (specify)</i>                                                                                     | <input type="text"/>                                               |
| 308  | Specify                                                                                                                                                                                              | <input type="text"/>                                               |
| 309  | Did you receive pregnancy care in your own home <i>(1)yes (2)no</i> <b>If no, go to 315</b>                                                                                                          | <input type="text"/>                                               |
| 310  | How many times have you been visited at home for pregnancy (antenatal) care this pregnancy? <i>Enter the number of times</i>                                                                         | <input type="text"/>                                               |
| 311  | When did the first visit to your home for pregnancy (antenatal care) take place? <i>(enter date)</i> <b>Interviewer: record from FHC if available</b>                                                | <input type="text"/> / <input type="text"/> / <input type="text"/> |
| 312  | How old was your pregnancy the first time you were visited at home for pregnancy care? <i>Record number of weeks</i><br><b>Interviewer: record from FHC if available</b>                             | <input type="text"/>                                               |
| 313  | Who saw you at that first visit?<br><i>(1) HEW (2) Nurse (3) volunteer (1)-(3) go to 315 (4) other (specify)</i>                                                                                     | <input type="text"/>                                               |
| 314  | Specify                                                                                                                                                                                              | <input type="text"/>                                               |
| 315  | Where do you plan to give birth this pregnancy?<br><i>(1)home<br/>(2)nearest health post<br/>(3)nearest health centre<br/>(4)nearest hospital<br/>(5)other health facility<br/>(6)don't yet know</i> | <input type="text"/>                                               |
|      | Can you tell me what are the problems in pregnancy that might need medical treatment? <b>(do not read out the list but probe: anything else?; select all that apply)</b>                             | <i>(1)yes<br/>(2)no</i>                                            |
| 316  | Severe headache                                                                                                                                                                                      | <input type="text"/>                                               |
| 317  | Blurry vision                                                                                                                                                                                        | <input type="text"/>                                               |
| 318  | Reduced or absent fetal movement                                                                                                                                                                     | <input type="text"/>                                               |
| 319  | High blood pressure                                                                                                                                                                                  | <input type="text"/>                                               |
| 320  | Edema of the face/hands (Probe – swelling)                                                                                                                                                           | <input type="text"/>                                               |
| 321  | Convulsions                                                                                                                                                                                          | <input type="text"/>                                               |
| 322  | Excessive vaginal bleeding                                                                                                                                                                           | <input type="text"/>                                               |
| 323  | Severe lower abdominal pain                                                                                                                                                                          | <input type="text"/>                                               |
| 324  | Fever                                                                                                                                                                                                | <input type="text"/>                                               |
| 325  | Other                                                                                                                                                                                                | <input type="text"/>                                               |
| 325a | None of these                                                                                                                                                                                        | <input type="text"/>                                               |
| 326  | Do you know where to go if you have any of these danger signs?<br><i>(1)yes (2)no (go to 329)</i>                                                                                                    | <input type="text"/>                                               |
|      | <b>If yes</b><br>Where were should you go? (Select all mentioned)                                                                                                                                    | <input type="text"/>                                               |
| 327A | <b>Hospital</b>                                                                                                                                                                                      | <input type="text"/>                                               |

|      |                                                                                                                                                                                                                                           |                 |
|------|-------------------------------------------------------------------------------------------------------------------------------------------------------------------------------------------------------------------------------------------|-----------------|
| 327B | <b>Health Center</b>                                                                                                                                                                                                                      | _               |
| 327C | <b>Health Post (327A – 327B) go to 329</b>                                                                                                                                                                                                | _               |
| 327D | <b>Other (specify)</b>                                                                                                                                                                                                                    | _               |
| 328  | Specify                                                                                                                                                                                                                                   | _               |
| 329  | Did you make any preparations for your delivery?<br>(1)yes (2)no – <b>skip to 338</b><br><b>Probe for getting the things she would need to have a safe delivery, and take care of herself at that time; do not mention specific items</b> | _               |
|      | What preparations did you make for this delivery?<br><b>Do not read out the list, probe – ‘anything else?’ – select all that apply</b>                                                                                                    | (1)yes<br>(2)no |
| 330  | Financial                                                                                                                                                                                                                                 | _               |
| 331  | Transport                                                                                                                                                                                                                                 | _               |
| 332  | Food                                                                                                                                                                                                                                      | _               |
| 333  | Identification of birth attendant                                                                                                                                                                                                         | _               |
| 334  | Identification of facility                                                                                                                                                                                                                | _               |
| 335  | Materials for clean delivery                                                                                                                                                                                                              | _               |
| 336  | Identified blood donor                                                                                                                                                                                                                    | _               |
| 337  | Other                                                                                                                                                                                                                                     | _               |
| 338  | Did you sleep under a bednet last night?<br>(1)yes (2)no (if no, skip to 341)                                                                                                                                                             | _               |
| 339  | What kind of net was it? (select one)<br>(1)LLIN (2)Ordinary net with no insecticide added (3)Ordinary net with insecticide added                                                                                                         | _               |
| 340  | How many years ago did your household obtain that net? (enter number of years before survey date; if less than one year before survey enter 0; if don't know enter 99)                                                                    | _ _             |

### All women 13-49

Now I would like to ask you some questions about any pregnancies that you have had

|     |                                                                                                                                                                   |     |
|-----|-------------------------------------------------------------------------------------------------------------------------------------------------------------------|-----|
| 341 | Just to ask you again, have you ever been pregnant even if that pregnancy did not lead to a live birth?<br>(1)Yes (Continue) (2)No (End of interview)             | _   |
| 342 | In total, how many times have you ever been pregnant, including those pregnancies that did not lead to a live birth?<br><i>Enter total number of pregnancies.</i> | _ _ |
| 343 | Have you ever given birth?<br>(1)Yes (2)No (End of interview)                                                                                                     | _   |
| 344 | How many times have you ever given birth even if the baby was not born alive?<br><i>Enter total number</i>                                                        | _ _ |
| 345 | How many of your births ended with a live born baby?<br><i>Enter total number of live births</i>                                                                  | _ _ |
| 346 | Have you ever given birth to a child who cried or showed signs of life but unfortunately died later?<br>(1)yes (2) no – skip to 348                               | _   |
| 347 | <b>If yes, a child died:</b><br>How many of your live born children have ever died?<br>(write number)                                                             | _ _ |

|     |                                                                                                                                                                                  |                             |
|-----|----------------------------------------------------------------------------------------------------------------------------------------------------------------------------------|-----------------------------|
| 348 | How many times have you been pregnant since 2005?<br>(Enter number; if 0, end of interview for this woman)                                                                       | _                           |
| 349 | How many times have you had a birth since 2005 that ended in a live born baby (even if baby later died)?<br>(Enter number; if 0, end of interview for this woman)                | _                           |
| 350 | What was the date of your last live birth since 2005 ?<br>(Enter date dd/mm/yyyy; don't know date enter 99 for dd, probe for month and year)                                     | _ _ _ / _ _ _ / _ _ _ _ _ _ |
| 351 | Was it a single or multiple birth? (1) single (2)twins<br>(3)three or more babies                                                                                                | _                           |
| 352 | What was the name of the child (first child to be born if not a singleton birth; enter name)                                                                                     | _ _ _ _ _ _ _ _ _ _ _ _ _ _ |
| 353 | What was the gender of the child (first child to be born if not a singleton birth) (1)male (2)female                                                                             | _                           |
| 354 | Is the child still alive today? (1)yes – go to 356 (2)no                                                                                                                         | _                           |
| 355 | If died When did the child die?<br>(Enter date dd/mm/yyyy; don't know date enter 99 for dd, probe for month and year) – SKIP TO 357                                              | _ _ _ / _ _ _ / _ _ _ _ _ _ |
| 356 | How old is the child now in completed months? Enter number of months; if less than 1 month enter 0)                                                                              | _ _                         |
| 357 | Can I just check. Have you had any other live birth since the one you have been telling me about? (1)yes (2)no; If the answer here is yes, go back and check the responses again | _                           |

If there were no live births since 2005 it is the end of interview, thank the woman for her time, and go to next woman in the household. If there was a live birth, continue.

Module 3. Women aged 13-49 who had a live birth since 2005 (Ethiopia calendar)

Now I want to talk to you about the last birth you had that ended on [DATE], with the birth of [NAME]

|     |                                                                                                                                                                                                                                                                   |                                                                    |
|-----|-------------------------------------------------------------------------------------------------------------------------------------------------------------------------------------------------------------------------------------------------------------------|--------------------------------------------------------------------|
| 401 | Do you have a family health card with information about that pregnancy and birth?<br>(1)yes (2)no – skip to 403                                                                                                                                                   | <input type="checkbox"/>                                           |
| 402 | <b>If yes:</b> May I see your family health card?<br>(1)yes (2)no                                                                                                                                                                                                 | <input type="checkbox"/>                                           |
| 403 | When pregnant with [NAME], did you receive any care during pregnancy?<br><b>Probe: care at the HP, at a health facility, or visits at home from a HEW/CHP/HDA</b> (1)Yes (2)No ( <b>SKIP TO 445</b> )                                                             | <input type="checkbox"/>                                           |
| 404 | Did you receive pregnancy care from a health post (1)yes (2)no ( <b>if no go to 418</b> )                                                                                                                                                                         | <input type="checkbox"/>                                           |
| 405 | How many times did you attend the health post for pregnancy (antenatal) care that pregnancy? <i>Enter the number of times</i>                                                                                                                                     | <input type="checkbox"/>                                           |
| 406 | When did your first visit to the HP take place?<br>(enter date)<br><b>Interviewer: record from FHC if available</b>                                                                                                                                               | <input type="text"/> / <input type="text"/> / <input type="text"/> |
| 407 | How old was your pregnancy at the first visit? (record no.weeks)<br><b>Interviewer: record from FHC if available</b>                                                                                                                                              | <input type="text"/>                                               |
| 408 | Who saw you at that first visit?<br>(1) HEW (2) Nurse (3) volunteer (4) other (specify)                                                                                                                                                                           | <input type="checkbox"/>                                           |
| 409 | Specify <input type="text"/>                                                                                                                                                                                                                                      |                                                                    |
| 410 | The last time you visited the health post for pregnancy care, how did you travel there? (1)walked (2)bicycle (3)motorised vehicle (4)animal back (5)other                                                                                                         | <input type="checkbox"/>                                           |
| 411 | The last time you visited the health post for pregnancy care, how many minutes did you spend there (including the waiting time and the time spent with the HEW?) <i>Enter number of minutes, e.g. if half an hour enter 30, if 1 hour and 10 minutes enter 70</i> | <input type="text"/>                                               |
| 412 | When you attended the health post, did you have to pay any cash to see the HEW there? (1)yes (2)no <b>go to 414</b>                                                                                                                                               | <input type="checkbox"/>                                           |
| 413 | How much cash did you pay to the health post or HEW for your pregnancy care in total? <i>Enter the amount in Birr</i>                                                                                                                                             | <input type="text"/>                                               |
| 414 | When you attended the health post, did you have to give any non-cash gifts to see the HEW there? (1)yes (2)no                                                                                                                                                     | <input type="checkbox"/>                                           |
| 418 | Did you receive pregnancy care from a health facility (1)yes (2)no ( <b>if no, go to 432</b> )                                                                                                                                                                    | <input type="checkbox"/>                                           |
| 419 | How many times did you attend the health facility for pregnancy (antenatal) care that pregnancy? <i>Enter the number of times</i>                                                                                                                                 | <input type="checkbox"/>                                           |
| 420 | When did your first visit to the health center take place?<br>(enter date)<br><b>Interviewer: record from FHC if available</b>                                                                                                                                    | <input type="text"/> / <input type="text"/> / <input type="text"/> |
| 421 | How old was your pregnancy at the first visit? (record no.weeks)<br><b>Interviewer: record from FHC if available</b>                                                                                                                                              | <input type="text"/>                                               |
| 422 | Who saw you at that first visit?<br>(1) HEW (2) Nurse/midwife (3) volunteer (1) (2) (3) <b>go to 424</b> (4) other (specify)                                                                                                                                      | <input type="checkbox"/>                                           |
| 423 | Specify <input type="text"/>                                                                                                                                                                                                                                      |                                                                    |
| 424 | The last time you visited the health facility for pregnancy care, how did you travel there? (1)walked (2)bicycle (3)motorised vehicle (4) animal back (5)other                                                                                                    | <input type="checkbox"/>                                           |
| 425 | The last time you visited the health facility for pregnancy care, how many minutes did you spend there (including the waiting time and the time spent with a health worker)?<br><i>Enter number of minutes, e.g. if half an hour enter 30, if 1 hour and 10</i>   | <input type="text"/>                                               |

|     |                                                                                                                                                                                                         |                 |
|-----|---------------------------------------------------------------------------------------------------------------------------------------------------------------------------------------------------------|-----------------|
|     | <b>minutes enter 70</b>                                                                                                                                                                                 |                 |
| 426 | When you attended antenatal care at the health center, did you have to pay any cash to see a health worker there? (1)yes (2)no <b>go to 428</b>                                                         | _               |
| 427 | How much cash did you pay to the health facility or health worker for your pregnancy care in total? <i>Enter the amount in Birr</i>                                                                     | _ _             |
| 428 | When you attended the pregnancy care in the health facility, did you have to give any non-cash gifts to see the health worker there? (1)yes (2)no <b>go to 432</b>                                      | _               |
| 432 | Did you receive pregnancy care in your own home (1)yes (2)no <b>(if no go to 445)</b>                                                                                                                   | _               |
| 433 | How many times were you visited at home for pregnancy (antenatal) care that pregnancy? <i>Enter the number of times</i>                                                                                 | _               |
| 434 | When did the first visit to you at home take place?? <i>Enter date</i>                                                                                                                                  | _ _ / _ _ / _ _ |
| 435 | How old was your pregnancy the first time you were visited at home for pregnancy care? <i>record number of weeks</i>                                                                                    | _ _             |
| 436 | Who was it who came to visit you the first time? (1)HEW (2)nurse/midwife (3)volunteer (HDA) (4)other – specify                                                                                          | _               |
| 437 | Specify                                                                                                                                                                                                 | _____           |
| 438 | The last time you were visited at home for pregnancy care, how many minutes did she spend at your home? <i>Enter number of minutes, e.g. if half an hour enter 30 if 1 hour and 10 minutes enter 70</i> | _ _             |
| 439 | When you were visited at home for pregnancy care, did you ever have to pay any cash to the volunteer/HEW/Nurse/Midwife? (1)yes (2)no – <b>go to 441</b>                                                 | _               |
| 440 | How much cash did you have to pay for your pregnancy care at home in total? <i>Enter total in Birr</i>                                                                                                  | _ _             |
| 441 | When you were visited at home for pregnancy care, did you ever have to give any non-cash gifts to see the home visitor? (1)yes (2)no – <b>go to 445</b>                                                 | _               |

|     |                                                                                                                                                       |   |
|-----|-------------------------------------------------------------------------------------------------------------------------------------------------------|---|
|     | When you were pregnant that time, did you have the following at any time?<br><b>(enter yes or no and verify with family health card if available)</b> |   |
| 445 | Was your weight measured? (1)yes (2)no <b>if no skip to 448</b>                                                                                       | _ |
| 446 | <b>If yes:</b> Which was the provider who did this the first time?<br>(1)HEW, (2)Nurse/midwife, (3)CHP, (4)HDA, (5)Shop, (6)Other                     | _ |
| 448 | Was your height measured? (1)yes (2)no <b>if no skip to 451</b>                                                                                       | _ |
| 449 | <b>If yes:</b> Which was the provider who did this the first time?<br>(1)HEW, (2)Nurse/midwife, (3)CHP, (4)HDA, (5)Shop, (6)Other                     | _ |
| 451 | Did you receive information about breastfeeding your baby? (1)yes (2)no <b>if no skip to 454</b>                                                      | _ |
| 452 | <b>If yes:</b> Which was the provider who did this the first time?<br>(1)HEW, (2)Nurse/midwife (3)CHP (4)HDA (5)Shop (6)Other                         | _ |
| 454 | Did you receive information about danger signs for newborns? (1)yes (2)no <b>if no skip to 457</b>                                                    | _ |
| 455 | <b>If yes:</b> Which was the provider who did this the first time?<br>(1)HEW, (2)Nurse/midwife (3)CHP (4)HDA (5)Shop (6)Other                         | _ |
| 457 | Did you receive information about the things you need to prepare for your birth?<br>(1)yes (2)no <b>if no skip to 460</b>                             | _ |
| 458 | <b>If yes:</b> Which was the provider who did this the first time?<br>(1)HEW, (2)Nurse/midwife (3)CHP (4)HDA (5)Shop (6)Other                         | _ |
| 460 | Was your blood pressure tested (1)yes (2)no <b>if no skip to 463</b><br>(PROBE: when a strap was put around your upper arm and a measure taken)       | _ |

|      |                                                                                                                                                                     |                                                                            |
|------|---------------------------------------------------------------------------------------------------------------------------------------------------------------------|----------------------------------------------------------------------------|
| 461  | <b>If yes:</b> Which was the provider who did this the first time?<br>(1)HEW, (2)Nurse/midwife (3)CHP (4)HDA (5)Shop (6)Other                                       | <input type="checkbox"/>                                                   |
| 463  | Did you give a urine sample for a test (1)yes (2)no <b>if no skip to 466</b>                                                                                        | <input type="checkbox"/>                                                   |
| 464  | <b>If yes:</b> Which was the provider who did this the first time?<br>(1)HEW, (2)Nurse/midwife, (3)CHP (4) HDA (5)Shop (6)OtherC                                    | <input type="checkbox"/>                                                   |
| 466  | Did you get information about babies getting HIV/AIDS from their mother? (1)yes<br>(2)no<br><b>if no skip to 468</b>                                                | <input type="checkbox"/>                                                   |
| 467  | <b>If yes:</b> Which was the provider who did this the first time?<br>(1)HEW, (2)Nurse/midwife, (3)CHP (4)HDA (5)Shop (6)Other                                      | <input type="checkbox"/>                                                   |
| 468  | Did you receive information about things that you can do to prevent getting the HIV/AIDS virus? <b>if no skip to 470</b>                                            | <input type="checkbox"/>                                                   |
| 469  | <b>If yes:</b> Which was the provider who did this the first time?<br>(1)HEW, (2)Nurse/midwife, (3)CHP (4)HDA (5)Shop (6)Other                                      | <input type="checkbox"/>                                                   |
| 470  | Did you receive information about getting tested for the HIV/AIDS virus? 1)Yes<br>(2)No <b>If no skip to 472</b>                                                    | <input type="checkbox"/>                                                   |
| 471  | <b>If yes:</b> Which was the provider who did this the first time?<br>(1)HEW, (2)Nurse/midwife, (3)CHP (4)HDA (5)Shop (6)Other                                      | <input type="checkbox"/>                                                   |
| 472  | Did you give blood for any test? (1)yes (2)no <b>If no skip to 475</b>                                                                                              | <input type="checkbox"/>                                                   |
| 473  | <b>If yes:</b> Which was the provider who did this the first time?<br>(1)HEW, (2)Nurse/midwife, (3)CHP (4)HDA (5)Shop (6)Other                                      | <input type="checkbox"/>                                                   |
| 475  | I don't want to know the result, but did you receive a test result for syphilis?(1)yes<br>(2)no                                                                     | <input type="checkbox"/>                                                   |
| 476  | I don't want to know the result, but did you receive a test result for HIV? (1)yes<br>(2)no                                                                         | <input type="checkbox"/>                                                   |
| 477  | Did you receive advice about preparing for birth? (1)yes (2)no <b>if no skip to 479</b>                                                                             | <input type="checkbox"/>                                                   |
| 478  | <b>If yes:</b> Which was the provider who did this the first time?<br>(1)HEW, (2)Nurse/midwife, (3)CHP (4)HDA (5)Shop (6)Other                                      | <input type="checkbox"/>                                                   |
| 479  | Were you told things to look out for that might suggest problems with the pregnancy?<br>(1)yes (2)no <b>if no skip to 481</b>                                       | <input type="checkbox"/>                                                   |
| 480  | <b>If yes:</b> Which was the provider who did this the first time?<br>(1)HEW, (2)Nurse/midwife, (3)CHP (4)HDA (5)Shop (6)Other                                      | <input type="checkbox"/>                                                   |
| 481  | Did you receive medicine for intestinal worms? (1)yes (2)no <b>if no skip to 484</b>                                                                                | <input type="checkbox"/>                                                   |
| 482  | <b>If yes:</b> Which was the provider who did this the first time?<br>(1)HEW, (2)Nurse/midwife, (3)CHP (4)HDA (5)Shop (6)Other                                      | <input type="checkbox"/>                                                   |
| 484  | Did you receive medicine to prevent malaria? (1)yes (2)no<br>(PROBE:medicine called <i>sulphadoxine pyrimethamine</i> ) <b>IF NO SKIP TO 488a</b>                   | <input type="checkbox"/>                                                   |
| 485  | <b>If yes</b><br>How many doses of medicine to prevent malaria were you given?<br>(PROBE: how many times were you given the medicine?) <i>Write number of doses</i> | <input type="checkbox"/>                                                   |
| 486  | <b>If yes:</b> Which was the provider who gave you this the first time?<br>(1)HEW, (2)Nurse/midwife, (3)CHP (4)HDA (5)Shop (6)Other                                 | <input type="checkbox"/>                                                   |
| 488a | Were you tested for anaemia? (1)yes (2)no (3)don't know                                                                                                             | <input type="checkbox"/>                                                   |
| 488  | Did you receive iron tablets or iron syrup? (1)yes (2)no<br><b>IF NO SKIP TO 492a</b>                                                                               | <input type="checkbox"/>                                                   |
| 489  | <b>If yes:</b> For how many days did you take the tablets or syrup?                                                                                                 | <input type="checkbox"/> <input type="checkbox"/> <input type="checkbox"/> |

|      |                                                                                                                                                                                                   |                 |
|------|---------------------------------------------------------------------------------------------------------------------------------------------------------------------------------------------------|-----------------|
|      | <i>Write number of days, or write 99 if doesn't remember, 0 if didn't take</i>                                                                                                                    |                 |
| 490  | <b>If yes:</b> Which was the provider who gave you this the first time?<br>(1)HEW, (2)Nurse/midwife, (3)CHP (4)HDA (5)Shop (6)Other                                                               | __              |
| 492a | Did you receive misoprostol (the drug to stop women bleeding after birth)? (1)yes<br>(2)no (3)don't know                                                                                          | __              |
| 492  | Were you given an injection in the arm to prevent the baby from getting tetanus,<br>that is, convulsions after birth? <b>IF NO SKIP TO 497</b>                                                    | __              |
| 493  | <b>If yes</b><br>How many times did you get a tetanus injection? (write number of times)<br><b>IF 2 or more times SKIP TO 497</b>                                                                 | __              |
| 494  | <b>If less than 2 times:</b><br>At any time before this pregnancy did you receive any tetanus injections?<br>(1)yes (2)no - <b>SKIP TO 497</b>                                                    | __              |
| 495  | <b>IF 494 WAS YES</b><br>Before this pregnancy, how many times did you receive a tetanus injection?<br>(write number of times)                                                                    | __              |
| 496  | How many years ago did you receive the last tetanus injection before this<br>pregnancy? Write number of years ago                                                                                 | __              |
|      | Can you tell me what are the danger signs in pregnancy that might need medical<br>treatment?<br><b>(do not read out the list, , select all mentioned, probe – 'anything else')</b>                | (1)yes<br>(2)no |
| 497  | Severe headache                                                                                                                                                                                   | __              |
| 498  | Blurry vision                                                                                                                                                                                     | __              |
| 499  | Reduced or absent fetal movement                                                                                                                                                                  | __              |
| 500  | High blood pressure                                                                                                                                                                               | __              |
| 501  | Edema of the face/hands (Probe – swelling)                                                                                                                                                        | __              |
| 502  | Convulsions                                                                                                                                                                                       | __              |
| 503  | Excessive vaginal bleeding                                                                                                                                                                        | __              |
| 504  | Severe lower abdominal pain                                                                                                                                                                       | __              |
| 505  | Fever                                                                                                                                                                                             | __              |
| 506  | Anaemia                                                                                                                                                                                           | __              |
| 507  | Other                                                                                                                                                                                             | __              |
| 507a | None of these                                                                                                                                                                                     | __              |
| 508  | Were you told where to go if you had any complications? (1)yes (2)no -(go to 510)                                                                                                                 | __              |
|      | <b>If yes</b> Where were you told to go? (Select all mentioned)                                                                                                                                   |                 |
| 509A | <b>Hospital</b>                                                                                                                                                                                   | __              |
| 509B | <b>Health Center</b>                                                                                                                                                                              | __              |
| 509C | <b>Health Post</b>                                                                                                                                                                                | __              |
| 509D | <b>Other</b>                                                                                                                                                                                      | __              |
| 510  | During your last pregnancy did you make any preparations for your delivery?<br>(1)yes (2)no – <b>skip to 522</b><br><b>Probe: for finances, for help during delivery, transport, emergencies?</b> | __              |
|      | What preparations did you make for the delivery?<br><b>Do not read out the list, probe – anything else? – select all that apply</b>                                                               | (1)yes<br>(2)no |
| 511  | Financial                                                                                                                                                                                         | __              |
| 512  | Transport                                                                                                                                                                                         | __              |
| 513  | Food                                                                                                                                                                                              | __              |
| 514  | Identification of birth attendant                                                                                                                                                                 | __              |
| 515  | Identification of facility                                                                                                                                                                        | __              |
| 516  | Clean clothes                                                                                                                                                                                     | __              |
| 517  | Cover to deliver on                                                                                                                                                                               | __              |

|      |         |                                  |                          |
|------|---------|----------------------------------|--------------------------|
| 518  |         | Gloves                           | <input type="checkbox"/> |
| 519  |         | Cotton gauze                     | <input type="checkbox"/> |
| 519a |         | Clean instrument to cut the cord | <input type="checkbox"/> |
| 520  |         | Other ( <i>specify</i> )         | <input type="checkbox"/> |
| 521  | Specify | <input type="text"/>             | <input type="checkbox"/> |

Now I have some questions to ask you about what happened to you during and after the delivery

|      |                                                                                                                                                                                                                                                                             |                                                                                     |
|------|-----------------------------------------------------------------------------------------------------------------------------------------------------------------------------------------------------------------------------------------------------------------------------|-------------------------------------------------------------------------------------|
|      | First, I want to ask you about the danger signs in a woman during childbirth that need medical treatment. Can you tell me what these might be?<br><b>Do not read out the list, mark all that apply with 1, mark all that don't apply with 2, ask – 'anything else?'</b>     | (1)yes (2)no                                                                        |
| 522  | Excessive vaginal bleeding                                                                                                                                                                                                                                                  | <input type="checkbox"/>                                                            |
| 523  | Foul-smelling discharge                                                                                                                                                                                                                                                     | <input type="checkbox"/>                                                            |
| 524  | High fever                                                                                                                                                                                                                                                                  | <input type="checkbox"/>                                                            |
| 525  | Baby's hand or feet come first                                                                                                                                                                                                                                              | <input type="checkbox"/>                                                            |
| 526  | Baby in abnormal position                                                                                                                                                                                                                                                   | <input type="checkbox"/>                                                            |
| 527  | Prolonged labour >12 hours                                                                                                                                                                                                                                                  | <input type="checkbox"/>                                                            |
| 528  | Retained placenta                                                                                                                                                                                                                                                           | <input type="checkbox"/>                                                            |
| 529  | Rupture uterus                                                                                                                                                                                                                                                              | <input type="checkbox"/>                                                            |
| 530  | Prolapsed cord                                                                                                                                                                                                                                                              | <input type="checkbox"/>                                                            |
| 531  | Cord around neck                                                                                                                                                                                                                                                            | <input type="checkbox"/>                                                            |
| 532  | Convulsions                                                                                                                                                                                                                                                                 | <input type="checkbox"/>                                                            |
| 533  | Other                                                                                                                                                                                                                                                                       | <input type="checkbox"/>                                                            |
| 533a | None of these                                                                                                                                                                                                                                                               | <input type="checkbox"/>                                                            |
| 533b | What gestation were you when you went into labour? <b>Probe for number of gestation weeks, ask whether she went into labour early or on time; check on health card if available; enter number of weeks or enter 99 if don't know</b>                                        | <input type="text"/> <input type="text"/>                                           |
| 533c | Did anyone check your blood pressure when you were in labour?<br>(1)yes (2)no (3) don't know                                                                                                                                                                                | <input type="checkbox"/>                                                            |
| 533d | When you were in labour, did anyone give you an injection specifically to slow down the labour because your labour had started too early?<br>(1)yes (2) no (3) don't know                                                                                                   | <input type="checkbox"/>                                                            |
| 534  | Now about your delivery:<br>Who was the primary person who assisted with the delivery?<br>(1)Doctor (2)Nurse/Midwife (3)Health Extension Worker (4) Community Health Volunteer (5) Traditional birth attendant (6) Relative/friend (7)No-one ( <b>go to 545</b> ) (8) Other |                                                                                     |
| 535  | Was anyone else present?<br>(1)yes (2)no – <b>go to 537</b>                                                                                                                                                                                                                 | <input type="checkbox"/>                                                            |
| 536  | <b>If yes:</b> Who else was present at the delivery?<br>(1)Doctor (2)Nurse/Midwife (3)HEW (4) Community Health Volunteer (5)Traditional birth attendant (6) Relative/friend (7) Other                                                                                       | <input type="checkbox"/>                                                            |
| 537  | Did you have to pay any cash money to the person/people assisting you at delivery?<br>(1)yes (2)no – <b>go to 539</b>                                                                                                                                                       | <input type="checkbox"/>                                                            |
| 538  | <b>If yes:</b> How much cash money did you pay? <i>Enter the amount in Birr</i>                                                                                                                                                                                             | <input type="text"/> <input type="text"/> <input type="text"/> <input type="text"/> |
| 539  | Did you have to give any non-cash gifts to the person/people assisting you at delivery?<br>(1)yes (2)no – <b>go to 543</b>                                                                                                                                                  | <input type="checkbox"/>                                                            |
| 543  | When you gave birth, did the person assisting you wear gloves during delivery?<br>(1)yes (2)no (3)don't know                                                                                                                                                                | <input type="checkbox"/>                                                            |



|      |                                                                                                                                                                                                                                               |                          |
|------|-----------------------------------------------------------------------------------------------------------------------------------------------------------------------------------------------------------------------------------------------|--------------------------|
| 544  | When you gave birth, did the person assisting you wash her hands before the delivery?<br><i>(1)yes (2)no (3) don't know</i>                                                                                                                   | <input type="checkbox"/> |
| 545  | Where did you give birth?<br><i>(1)home –skip to 549 (2)health post (3)health center (4) hospital (5)other (specify)</i>                                                                                                                      | <input type="checkbox"/> |
| 546  | Specify                                                                                                                                                                                                                                       | <input type="checkbox"/> |
| 547  | <b>If 545 = (2)(3)(4)</b> - After giving birth, for how many days did you stay at the health facility in total?<br><i>Enter number of days, enter 0 if she left on the same day as delivery</i>                                               | <input type="checkbox"/> |
| 548  | Was [NAME] delivered by caesarean, that is, did they cut your belly open to take the baby out? <i>(1)yes (2)no</i>                                                                                                                            | <input type="checkbox"/> |
|      | <b>ALL:</b> During the delivery of [NAME] did you experience any of the following?<br><b>Read out the list, select all that apply</b>                                                                                                         | <i>(1)yes<br/>(2)no</i>  |
| 549  | Heavy bleeding                                                                                                                                                                                                                                | <input type="checkbox"/> |
| 550  | Labour more than 12 hours                                                                                                                                                                                                                     | <input type="checkbox"/> |
| 551  | Loss of consciousness                                                                                                                                                                                                                         | <input type="checkbox"/> |
| 552  | Premature labour                                                                                                                                                                                                                              | <input type="checkbox"/> |
| 553  | Foul discharge                                                                                                                                                                                                                                | <input type="checkbox"/> |
| 554  | Baby in abnormal position                                                                                                                                                                                                                     | <input type="checkbox"/> |
| 554a | None of these                                                                                                                                                                                                                                 | <input type="checkbox"/> |
| 555  | During delivery were you advised to go to a clinic to get special care (a health post or health center if a home birth, a different facility if it was a health post/center birth)? <i>(1)yes (2)no – SKIP TO 560</i>                         | <input type="checkbox"/> |
| 556  | <b>If yes:</b> Did you go to that different health facility to get the special care (referral)?<br><i>(1)yes - skip to 559 (2)no go to 557</i>                                                                                                | <input type="checkbox"/> |
| 557  | Why not?<br><b>Probe for the most important reason and select one.</b> (1)facility was too far (2)cost too much money (3)don't like going to different facility (4)no permission to go (5)other (specify)<br><b>Now go to 560</b>             | <input type="checkbox"/> |
| 558  | Specify                                                                                                                                                                                                                                       |                          |
| 559  | <b>If 556 = yes:</b> What transport did you take to get there? <i>(1)own transport (2)public transport (3)hired transport (4)district ambulance (5) bike (6) walked (7) carried</i>                                                           | <input type="checkbox"/> |
|      | Now I want to ask you about any post-partum health checks you had after the birth                                                                                                                                                             |                          |
| 560  | In the first month after birth, did anyone check on your health? <b>Probe for health checks sometime after birth, not during the birth.</b><br><i>(1)yes (2)no – SKIP TO 581</i>                                                              | <input type="checkbox"/> |
| 561  | How many times did anyone check on your health in the first month after delivery?<br><i>Write number</i>                                                                                                                                      | <input type="checkbox"/> |
| 562  | How long after delivery did the first check take place?<br><i>Record number of days; if same day as delivery enter 0</i>                                                                                                                      | <input type="checkbox"/> |
| 563  | Who checked on your health for the first time after you gave birth to [NAME]? ( <b>Probe</b> for most qualified person) <i>(1)doctor (2)nurse/midwife (3)HEW (4)community health volunteer (5)TBA (6) Relative/friend (7) other (specify)</i> | <input type="checkbox"/> |
| 564  | Specify                                                                                                                                                                                                                                       |                          |

|      |                                                                                                                                                                                                            |              |
|------|------------------------------------------------------------------------------------------------------------------------------------------------------------------------------------------------------------|--------------|
|      |                                                                                                                                                                                                            |              |
| 565  | Where did this check take place?<br>(1)own home (2)other place in the community (3)health post (4)health centre (5)hospital<br><br><b>If her health was checked only once (see 561) now skip to 567</b>    | _            |
| 566  | <b>If her health was checked more than once (see 561)</b><br>How long after delivery did the second check take place? <b>Record number of days</b>                                                         | _ _          |
|      | During any of the health checks what was done to check on your health?<br><b>Do not read out the list, probe anything else? Select all that apply</b>                                                      | (1)yes (2)no |
| 567  | Examined body                                                                                                                                                                                              | _            |
| 568  | Checked breasts                                                                                                                                                                                            | _            |
| 569  | Checked for heavy bleeding                                                                                                                                                                                 | _            |
| 570  | Counselled on danger signs                                                                                                                                                                                 | _            |
| 571  | Counselled on family planning                                                                                                                                                                              | _            |
| 572  | Counselled on nutrition                                                                                                                                                                                    | _            |
| 573  | Referred to a health facility                                                                                                                                                                              | _            |
| 573a | None of these                                                                                                                                                                                              | _            |
| 574  | The last time your health was checked after the birth, how many minutes did the person spend checking you? <i>Enter number of minutes e.g. if half an hour enter 30, if 1 hour and 10 minutes enter 70</i> | _ _          |
| 575  | When the person checked on you after the birth, did you ever have to pay any cash to the person? (1)yes (2)no <b>go to 581</b>                                                                             | _            |
| 576  | <b>If yes:</b> How much cash did you have to pay to the volunteer for your health checks after birth in total? <i>Enter the amount in Birr</i>                                                             | _ _ _        |

Now I have some questions about what happened to [NAME] at the birth and immediately after.

|     |                                                                                                                                                                                                                         |              |
|-----|-------------------------------------------------------------------------------------------------------------------------------------------------------------------------------------------------------------------------|--------------|
| 581 | Can I see a card recording information about the birth?<br>(1)yes (2)no <b>Interviewer – use the card to verify all information if possible</b>                                                                         | _            |
|     | First, I want to ask you about the complications for a newborn that might need medical treatment. Can you tell me what these might be?<br><b>Do not read out the list, select all mentioned, ‘ask – anything else?’</b> | (1)yes (2)no |
| 582 | Fever                                                                                                                                                                                                                   | _            |
| 583 | Unable to suckle/feed                                                                                                                                                                                                   | _            |
| 584 | Difficult/fast breathing                                                                                                                                                                                                | _            |
| 585 | Diarrhea                                                                                                                                                                                                                | _            |
| 586 | Convulsions                                                                                                                                                                                                             | _            |
| 587 | Persistent vomiting                                                                                                                                                                                                     | _            |
| 588 | Yellow palms/soles/eyes                                                                                                                                                                                                 | _            |
| 589 | Lethargy                                                                                                                                                                                                                | _            |
| 590 | Unconscious                                                                                                                                                                                                             | _            |
| 591 | Red/discharging eyes                                                                                                                                                                                                    | _            |
| 592 | Skin pustules                                                                                                                                                                                                           | _            |
| 593 | Skin around cord was red                                                                                                                                                                                                | _            |
| 594 | Pus from cord                                                                                                                                                                                                           | _            |
| 595 | Born low birth weight                                                                                                                                                                                                   | _            |
| 596 | Born premature                                                                                                                                                                                                          | _            |
| 597 | Infection                                                                                                                                                                                                               | _            |
| 598 | Other                                                                                                                                                                                                                   | _            |
| 599 | None of these                                                                                                                                                                                                           | _            |

|      |                                                                                                                                                                                                          |                                                                                                                                                       |
|------|----------------------------------------------------------------------------------------------------------------------------------------------------------------------------------------------------------|-------------------------------------------------------------------------------------------------------------------------------------------------------|
| 600  | Was [NAME] weighed at birth?<br>(1)yes (2)no (3)don't know – (2) or (3) <b>SKIP TO 602</b>                                                                                                               | <input type="checkbox"/>                                                                                                                              |
| 601  | <b>If yes</b> How much did [NAME] weigh at birth?<br>(enter weight in grammes e.g. if the weight was 1.9 kilogrammes enter 1900; don't know write 9999; use the weight recorded on the card if possible) | <input type="checkbox"/> <input type="checkbox"/> <input type="checkbox"/> <input type="checkbox"/> <input type="checkbox"/> <input type="checkbox"/> |
| 602  | Did [NAME] have any difficulty breathing/crying at birth?<br>(1)yes (2)no – <b>skip to 608</b>                                                                                                           | <input type="checkbox"/>                                                                                                                              |
|      | Did anyone do any of the following to [NAME] immediately at birth?<br><b>Read out the list, select all that apply</b>                                                                                    | (1)yes (2)no                                                                                                                                          |
| 603  | Rubbing                                                                                                                                                                                                  | <input type="checkbox"/>                                                                                                                              |
| 604  | Stimulating                                                                                                                                                                                              | <input type="checkbox"/>                                                                                                                              |
| 605  | Mouth-to-mouth                                                                                                                                                                                           | <input type="checkbox"/>                                                                                                                              |
| 606  | Resuscitation                                                                                                                                                                                            | <input type="checkbox"/>                                                                                                                              |
| 607  | Don't know                                                                                                                                                                                               | <input type="checkbox"/>                                                                                                                              |
| 608  | Where was [NAME] placed immediately after delivery?<br>(1)alone/on the floor; (2)on the mother's belly/chest (3)beside the mother;<br>(4) with someone else; (5)other; (6)don't know                     | <input type="checkbox"/>                                                                                                                              |
| 608a | After the birth, was [NAME] placed on the bare skin of your chest for any time before you were moved?<br>(1)yes (2)no (3) don't know                                                                     | <input type="checkbox"/>                                                                                                                              |
| 609  | When [NAME] was born, was she/he dried/wiped?<br>(1)yes (2)no (3)don't know <b>2 and 3 skip to 611</b>                                                                                                   | <input type="checkbox"/>                                                                                                                              |
| 610  | <b>If yes:</b> How long after [NAME] was born was she/he dried/wiped? Enter in minutes, 999 if don't know. <b>Check for time after the baby was born, not time after the placenta came out</b>           | <input type="checkbox"/> <input type="checkbox"/> <input type="checkbox"/> <input type="checkbox"/>                                                   |
| 611  | When [NAME] was born, was she/he wrapped with a cloth?<br>(1)yes (2)no (3)don't know <b>(2) and (2) skip to 613</b>                                                                                      | <input type="checkbox"/>                                                                                                                              |
| 612  | <b>If yes:</b> How long after [NAME] was born was she/he wrapped with a cloth? Enter in minutes, 999 if don't know. <b>Check for time after the baby was born, not time after the placenta came out</b>  | <input type="checkbox"/> <input type="checkbox"/> <input type="checkbox"/> <input type="checkbox"/>                                                   |
| 613  | What was used to tie the cord?<br>(1)new string/thread (2)boiled string/thread (3)any string/thread (4)nothing<br>(5)don't know (6)other                                                                 | <input type="checkbox"/>                                                                                                                              |
| 614  | What was used to cut the cord?<br>(1)new razor blade (2)any razor blade (3)sterile scissors (4)don't know<br>(5)other                                                                                    | <input type="checkbox"/>                                                                                                                              |
|      |                                                                                                                                                                                                          |                                                                                                                                                       |
| 615  | Was anything applied to the cord after cutting and tying?<br>(1)yes (2)no (3)don't know – <b>2 and 3 skip to 623</b>                                                                                     | <input type="checkbox"/>                                                                                                                              |
|      | <b>If yes:</b> What was applied to the cord just after cutting the cord?<br><b>Do not prompt, select all that apply</b>                                                                                  | (1)yes (2)no                                                                                                                                          |
| 616  | Butter                                                                                                                                                                                                   | <input type="checkbox"/>                                                                                                                              |
| 617  | Ash                                                                                                                                                                                                      | <input type="checkbox"/>                                                                                                                              |
| 618  | Ointment                                                                                                                                                                                                 | <input type="checkbox"/>                                                                                                                              |
| 619  | Animal dung                                                                                                                                                                                              | <input type="checkbox"/>                                                                                                                              |
| 620  | Oil                                                                                                                                                                                                      | <input type="checkbox"/>                                                                                                                              |
| 621  | Cold water                                                                                                                                                                                               | <input type="checkbox"/>                                                                                                                              |
| 622  | Other                                                                                                                                                                                                    | <input type="checkbox"/>                                                                                                                              |
| 622a | Chlorhexidine                                                                                                                                                                                            | <input type="checkbox"/>                                                                                                                              |
| 623  | When [NAME] was born, how soon did you bathe him/her?<br>(1)in the first hour – <b>CONTINUE TO 624</b><br>(2)after one hour- <b>SKIP TO 625</b><br>(3)after one day – <b>SKIP TO 626</b>                 | <input type="checkbox"/>                                                                                                                              |

|      |                                                                                                                                                                                                                                                                                                                                    |                                 |
|------|------------------------------------------------------------------------------------------------------------------------------------------------------------------------------------------------------------------------------------------------------------------------------------------------------------------------------------|---------------------------------|
| 624  | <b>If in the first hour:</b> After how many minutes would you say? ( <i>write number of minutes</i> )<br><b>Enter 99 if don't know. Now go to 627</b>                                                                                                                                                                              | _ _                             |
| 625  | <b>If after one hour:</b> After how many hours would you say? ( <i>write number of hours; e.g. if response is 'after one hour' enter 1, if response is 'after one and a half hours' enter 1</i> )<br><b>Enter 99 if don't know Now go to 627</b>                                                                                   | _ _                             |
| 626  | <b>If after one day:</b> After how many days would you say? ( <i>write number of days e.g. if response is 'after one day' enter 1, if response is 'after one and a half days' enter 1</i> )                                                                                                                                        | _ _ _                           |
| 627  | In the first week of life, did you hold [NAME] skin to skin against your breasts during the daytime and nighttime?<br>(1) <i>yes always</i> (2) <i>yes very often</i> (3) <i>yes a few times</i> (4) <i>never</i> (5) <i>don't know</i>                                                                                            | _                               |
| 628  | In the first week of life, did you sleep with [NAME] against you at night, or did you lay him/her alone on the bed or elsewhere?<br>(1) <i>slept with mother</i> (2) <i>baby slept alone</i> (3) <i>baby slept with another person</i>                                                                                             | _                               |
| 629  | Did you ever breastfeed [NAME]?<br>(1) <i>Yes</i> (2) <i>No</i> – <b>SKIP TO 634</b>                                                                                                                                                                                                                                               | _                               |
| 630  | How long after birth did you first put [NAME] to the breast (even if the milk was not yet ready)?<br>(1) <i>in the first hour</i> - <b>CONTINUE TO 631</b><br>(2) <i>after one hour but during the first day</i> - <b>GO TO 632</b><br>(3) <i>after the first day of life</i> – <b>GOTO 633</b>                                    | _                               |
| 631  | <b>If in the first hour:</b> After how many minutes would you say? ( <i>write number of minutes</i> ) <b>Enter 99 if don't know. Now go to 634</b>                                                                                                                                                                                 | _ _                             |
| 632  | <b>If after one hour but during the first day:</b> After how many hours would you say?<br>( <i>write number of hours; e.g. if response is 'after one hour' enter 1, if response is 'after one and a half hours' enter 1; if response is 'after two and a half hours' enter 2</i> )<br><b>Enter 99 if don't know. Now go to 634</b> | _ _                             |
| 633  | <b>If after the first day of life:</b> After how many days did you first put [NAME] to the breast?<br><i>Enter number of days</i>                                                                                                                                                                                                  | _                               |
| 634  | Did you squeeze out and throw away the first milk?<br>(1) <i>yes</i> (2) <i>no</i>                                                                                                                                                                                                                                                 | _                               |
| 635  | In the first three days after delivery, was [NAME] given anything to drink other than breast milk? (1) <i>yes</i> (2) <i>no</i> <b>go to 641a</b>                                                                                                                                                                                  | _                               |
|      | <b>If yes:</b> What else was [NAME] given to drink in the first three days after delivery? <b>Do not probe, select all mentioned.</b>                                                                                                                                                                                              | (1) <i>yes</i><br>(2) <i>no</i> |
| 636  | Other type of milk                                                                                                                                                                                                                                                                                                                 | _                               |
| 637  | Plain water                                                                                                                                                                                                                                                                                                                        | _                               |
| 638  | Sugar/glucose/salt water solution                                                                                                                                                                                                                                                                                                  | _                               |
| 639  | Juice                                                                                                                                                                                                                                                                                                                              | _                               |
| 640  | Tea/infusions                                                                                                                                                                                                                                                                                                                      | _                               |
| 641  | Others                                                                                                                                                                                                                                                                                                                             | _                               |
| 641a | Did you breastfeed [NAME] yesterday or today? (1) <i>yes</i> , (2) <i>no</i> (3) <i>child no longer alive</i> - <b>skip to 642</b>                                                                                                                                                                                                 | _                               |
| 641b | Have you started to give [NAME] other types of liquid to drink?<br>(1) <i>yes</i> (2) <i>no</i>                                                                                                                                                                                                                                    | _                               |
|      | <b>Can I check: Have you given</b> [NAME] any of the following to drink yesterday or today? Read out the list, <b>select all mentioned.</b>                                                                                                                                                                                        | (1) <i>yes</i><br>(2) <i>no</i> |
| 641c | Other type of milk                                                                                                                                                                                                                                                                                                                 | _                               |
| 641d | Plain water                                                                                                                                                                                                                                                                                                                        | _                               |
| 641e | Sugar/glucose/salt water solution                                                                                                                                                                                                                                                                                                  | _                               |

|       |                                                                                                                                                                                                                                                                                                                |                          |
|-------|----------------------------------------------------------------------------------------------------------------------------------------------------------------------------------------------------------------------------------------------------------------------------------------------------------------|--------------------------|
| 641f  | Juice                                                                                                                                                                                                                                                                                                          | <input type="checkbox"/> |
| 641g  | Tea/infusions                                                                                                                                                                                                                                                                                                  | <input type="checkbox"/> |
| 641h  | Others                                                                                                                                                                                                                                                                                                         | <input type="checkbox"/> |
| 641h1 | Nothing given except breastmilk                                                                                                                                                                                                                                                                                | <input type="checkbox"/> |
| 641i  | Have you started to give [NAME] any food to eat (either solid or soft food)?<br>(1)yes (2)no                                                                                                                                                                                                                   | <input type="checkbox"/> |
| 642   | <p>Now about care after the birth</p> <p>In the month after [NAME] was born, did any health care provider or a traditional birth attendant check on his/her health? (1)yes (2)no – <b>SKIP TO 658</b></p> <p><b>Probe for checks done at the place of birth on the same day as birth, and checks after</b></p> | <input type="checkbox"/> |
| 643   | <b>If 642=yes:</b> In the month after [NAME] was born, how many times did a health care provider or a traditional birth attendant check on his/her health? <i>Write number of times</i>                                                                                                                        | <input type="checkbox"/> |
| 644   | <b>If 642=yes:</b> How long after delivery did the first check take place?<br>(Record number of days; if same day as delivery enter 0)                                                                                                                                                                         | <input type="checkbox"/> |
| 645   | <b>If 644 is more than one</b> How long after delivery did the second check take place? (Record number of days)                                                                                                                                                                                                | <input type="checkbox"/> |
| 646   | <b>If 642=yes:</b> Who checked on [NAME] health the first time? ( <b>Probe for most qualified person</b> ) (1)doctor (2)nurse/midwife (3)health extension worker (4)community health volunteer (5)TBA (6)Relatives/friend (7)other (specify)                                                                   | <input type="checkbox"/> |
| 647   | Specify <input type="text"/>                                                                                                                                                                                                                                                                                   |                          |
| 648   | <b>If 642=yes</b> Where did the first check on [NAME] take place?<br>(1)own home (2)other place in the community (3)health post (4) health centre (5) hospital                                                                                                                                                 | <input type="checkbox"/> |
|       | <b>If 642=yes</b> At any of the health checks in the first month, what was done to check the health of baby?<br><b>Do not read out list, select all that apply. Probe – anything else?</b>                                                                                                                     | (1)yes (2)no             |
| 649   | Generally examined/looked at babys body                                                                                                                                                                                                                                                                        | <input type="checkbox"/> |
| 650   | Weighed baby                                                                                                                                                                                                                                                                                                   | <input type="checkbox"/> |
| 651   | Checked cord                                                                                                                                                                                                                                                                                                   | <input type="checkbox"/> |
| 652   | Counselled on breastfeeding                                                                                                                                                                                                                                                                                    | <input type="checkbox"/> |
| 653   | Observed breastfeeding                                                                                                                                                                                                                                                                                         | <input type="checkbox"/> |
| 654   | Counselled on skin-to-skin contact/warmth                                                                                                                                                                                                                                                                      | <input type="checkbox"/> |
| 655   | Checked baby for danger signs                                                                                                                                                                                                                                                                                  | <input type="checkbox"/> |
| 656   | Counselled on danger signs                                                                                                                                                                                                                                                                                     | <input type="checkbox"/> |
| 657   | Referred to a health facility                                                                                                                                                                                                                                                                                  | <input type="checkbox"/> |

|      |                                                                                                                                                                        |                          |
|------|------------------------------------------------------------------------------------------------------------------------------------------------------------------------|--------------------------|
| 657a | Checked babys temperature                                                                                                                                              | <input type="checkbox"/> |
| 657b | None of these                                                                                                                                                          | <input type="checkbox"/> |
| 658a | Did [BABY] sleep under a bednet last night?<br>(1)yes (2)no (if no, skip to 658d)                                                                                      | <input type="checkbox"/> |
| 658b | What kind of net was it? (select one)<br>(1)LLIN (2)Ordinary net with no insecticide added (3)Ordinary net with insecticide added                                      | <input type="checkbox"/> |
| 658c | How many years ago did your household obtain that net? (enter number of years before survey date; if less than one year before survey enter 0; if don't know enter 99) | <input type="text"/>     |
| 658d | Have you ever taken [NAME] for a vaccination? <b>PROBE – HEALTH FACILITY OR VACCINATION DAY</b> (1)yes (2)no – GO TO 678                                               | <input type="checkbox"/> |
| 659  | <b>If yes:</b> Do you have any record/card where [NAME] vaccinations are written down? (1)yes (2)no                                                                    | <input type="checkbox"/> |
|      | Has [NAME] received the following vaccinations?                                                                                                                        |                          |
| 660  | BCG (1)yes (2)no(3)don't know<br><b>If (2)or(3) go to 662</b>                                                                                                          | <input type="checkbox"/> |
| 661  | <b>If yes:</b> When? record date given, or 99/99/9999 if date not available                                                                                            | <input type="text"/>     |
| 662  | Polio 0 (Polio given at birth and given in the mouth (oral)) (1)yes<br>(2)no (3)don't know <b>If (2)or(3) go to 664</b>                                                | <input type="checkbox"/> |
| 663  | <b>If yes:</b> When? record date given, or 99/99/9999 if date not available                                                                                            | <input type="text"/>     |
| 664  | Polio 1(1)yes (2)no(3)don't know<br><b>If (2)or(3) go to 666</b>                                                                                                       | <input type="checkbox"/> |
| 665  | <b>If yes:</b> When? record date given, or 99/99/9999 if date not available                                                                                            | <input type="text"/>     |
| 666  | Polio 2(1)yes (2)no(3)don't know<br><b>If (2)or(3) go to 668</b>                                                                                                       | <input type="checkbox"/> |
| 667  | <b>If yes:</b> When? record date given, or 99/99/9999 if date not available                                                                                            | <input type="text"/>     |
| 668  | DPT (Pentavalent) 1(1)yes (2)no(3)don't know<br><b>If (2)or(3) go to 670</b>                                                                                           | <input type="checkbox"/> |
| 669  | <b>If yes:</b> When? record date given, or 99/99/9999 if date not available                                                                                            | <input type="text"/>     |
| 670  | DPT (Pentavalent) 2(1)yes (2)no(3)don't know<br><b>If (2)or(3) go to 672</b>                                                                                           | <input type="checkbox"/> |
| 671  | <b>If yes:</b> When? record date given, or 99/99/9999 if date not available                                                                                            | <input type="text"/>     |
| 672  | DPT (Pentavalent) 3(1)yes (2)no(3)don't know<br><b>If (2)or(3) go to 674</b>                                                                                           | <input type="checkbox"/> |
| 673  | <b>If yes:</b> When? record date given, or 99/99/9999 if date not available                                                                                            | <input type="text"/>     |
| 673a | Pneumococcal Conjugate 1 (1)yes (2)no(3)don't know<br><b>If (2)or(3) go to 673c</b>                                                                                    | <input type="checkbox"/> |
| 673b | <b>If yes:</b> When? record date given, or 99/99/9999 if date not available                                                                                            | <input type="text"/>     |
| 673c | Pneumococcal Conjugate 2 (1)yes (2)no(3)don't know<br><b>If (2)or(3) go to 673e</b>                                                                                    | <input type="checkbox"/> |
| 673d | <b>If yes:</b> When? record date given, or 99/99/9999 if date not available                                                                                            | <input type="text"/>     |
| 673e | Pneumococcal Conjugate 3 (1)yes (2)no(3)don't know<br><b>If (2)or(3) go to 674</b>                                                                                     | <input type="checkbox"/> |
| 673f | <b>If yes:</b> When? record date given, or 99/99/9999 if date not available                                                                                            | <input type="text"/>     |
| 674  | Measles or MMR(1)yes (2)no(3)don't know<br><b>If (2)or(3) go to 676</b>                                                                                                | <input type="checkbox"/> |
| 675  | <b>If yes:</b> When? record date given, or 99/99/9999 if date not available                                                                                            | <input type="text"/>     |
| 676  | Vitamin A(1)yes (2)no(3)don't know<br><b>If (2)or(3) go to 677a</b>                                                                                                    | <input type="checkbox"/> |
| 677  | <b>If yes:</b> When? record date last dose given, or 99/99/9999 if date not available                                                                                  | <input type="text"/>     |

|      |                                                                                                                                                                                          |                                                                                                                                                           |
|------|------------------------------------------------------------------------------------------------------------------------------------------------------------------------------------------|-----------------------------------------------------------------------------------------------------------------------------------------------------------|
| 677a | Rota vaccine 1 (1)yes (2)no(3)don't know<br><b>If (2)or(3) go to 677c</b>                                                                                                                | <input type="checkbox"/>                                                                                                                                  |
| 677b | <b>If yes:</b> When? Record date given, or 99/99/9999 if date not available                                                                                                              | <input type="checkbox"/> <input type="checkbox"/> <input type="checkbox"/> / <input type="checkbox"/> <input type="checkbox"/> <input type="checkbox"/> / |
| 677c | Rota vaccine 2 (1)yes (2)no(3)don't know<br><b>If (2)or(3) go to 678</b>                                                                                                                 | <input type="checkbox"/>                                                                                                                                  |
| 677d | <b>If yes:</b> When? Record date given, or 99/99/9999 if date not available                                                                                                              | <input type="checkbox"/> <input type="checkbox"/> <input type="checkbox"/> / <input type="checkbox"/> <input type="checkbox"/> <input type="checkbox"/> / |
| 678  | <b>INTERVIEWER STOP TO CHECK:<br/>WAS THE BABY BORN 0-60 DAYS BEFORE DATE OF INTERVIEW?</b><br>(1)Yes (2)No<br><br><b>IF YES - CONTINUE, IF NO – END</b>                                 | <input type="checkbox"/>                                                                                                                                  |
|      | Now I want to talk to you about any sickness your child experienced in the first month of life.                                                                                          |                                                                                                                                                           |
| 679  | Has [NAME] ever been sick?<br>(1)yes (2)no                                                                                                                                               | <input type="checkbox"/>                                                                                                                                  |
|      | Can I just check, has [NAME] ever had any of the following symptoms?<br><b>Enter 1 if yes to any and continue, if no to all these symptoms enter 1 for 'no symptoms' and skip to end</b> | (1)yes (2)no                                                                                                                                              |
| 680  | Stopped feeding well                                                                                                                                                                     | <input type="checkbox"/>                                                                                                                                  |
| 681  | Difficult or fast breathing                                                                                                                                                              | <input type="checkbox"/>                                                                                                                                  |
| 682  | Chest in-drawing                                                                                                                                                                         | <input type="checkbox"/>                                                                                                                                  |
| 683  | Unusually hot or cold                                                                                                                                                                    | <input type="checkbox"/>                                                                                                                                  |
| 684  | Baby less active than usual                                                                                                                                                              | <input type="checkbox"/>                                                                                                                                  |
| 685  | Body became yellow                                                                                                                                                                       | <input type="checkbox"/>                                                                                                                                  |
| 686  | Other (specify)                                                                                                                                                                          | <input type="checkbox"/>                                                                                                                                  |
| 687  | Specify                                                                                                                                                                                  |                                                                                                                                                           |
| 688  | No symptoms <b>end of interview if no symptoms checked</b>                                                                                                                               | <input type="checkbox"/>                                                                                                                                  |
| 689  | <b>If any sickness/symptom reported:</b><br>How old was [NAME] when sick for the first time?<br>Record number of days of age when [NAME] was first sick; if first day of life enter 0    | <input type="checkbox"/>                                                                                                                                  |
| 690  | When [NAME] was sick that first time what was the problem?<br>Probe for all the following symptoms:select all that apply                                                                 | (1)yes (2)no                                                                                                                                              |
| 691  | Fever                                                                                                                                                                                    | <input type="checkbox"/>                                                                                                                                  |
| 692  | Unable to suckle/feed                                                                                                                                                                    | <input type="checkbox"/>                                                                                                                                  |
| 693  | Difficult/fast breathing                                                                                                                                                                 | <input type="checkbox"/>                                                                                                                                  |
| 694  | Diarrhea                                                                                                                                                                                 | <input type="checkbox"/>                                                                                                                                  |
| 695  | Convulsions                                                                                                                                                                              | <input type="checkbox"/>                                                                                                                                  |
| 696  | Persistent vomiting                                                                                                                                                                      | <input type="checkbox"/>                                                                                                                                  |
| 697  | Yellow palms/soles/eyes                                                                                                                                                                  | <input type="checkbox"/>                                                                                                                                  |
| 698  | Lethargy                                                                                                                                                                                 | <input type="checkbox"/>                                                                                                                                  |
| 699  | Unconscious                                                                                                                                                                              | <input type="checkbox"/>                                                                                                                                  |
| 700  | Red/discharging eyes                                                                                                                                                                     | <input type="checkbox"/>                                                                                                                                  |
| 701  | Skin pustules                                                                                                                                                                            | <input type="checkbox"/>                                                                                                                                  |
| 702  | Skin around cord was red                                                                                                                                                                 | <input type="checkbox"/>                                                                                                                                  |
| 703  | Pus from cord                                                                                                                                                                            | <input type="checkbox"/>                                                                                                                                  |
| 704  | Other                                                                                                                                                                                    | <input type="checkbox"/>                                                                                                                                  |
| 705  | Did you seek care for [NAME] outside the home at that time?<br>(1)yes – go to 707 (2)no                                                                                                  | <input type="checkbox"/>                                                                                                                                  |
| 706  | <b>If no care sought at that time:</b><br>Why didn't you seek care for [NAME] outside the home during that first illness?                                                                | <input type="checkbox"/>                                                                                                                                  |

|     |                                                                                                                                                                                                                                               |                 |
|-----|-----------------------------------------------------------------------------------------------------------------------------------------------------------------------------------------------------------------------------------------------|-----------------|
|     | (1)expected him/her to get better (2) health facility too far (3) cost of treatment too expensive (4) don't trust the facility (5) family member didn't allow (6) community advisor/TBA advised against it (7) other ( <b>NOW GO TO 712</b> ) |                 |
| 707 | <b>If 705=yes:</b><br>How many times did you seek care for that illness?<br><i>Write number of times</i>                                                                                                                                      | _               |
| 708 | Where outside the home did you seek care from the first time?<br><i>(1)health post (2)health centre (3)hospital (4)community health worker (5) shop/pharmacy (6) other</i>                                                                    | _               |
| 709 | Do you have any medical record from when you went for health care outside the home the first time? (1)yes (2)no – <b>go to 711</b>                                                                                                            | _               |
| 710 | <b>If yes</b><br>Can I see it? (1)yes (2)no <b>Interviewer- use the card to verify responses if possible</b>                                                                                                                                  | _               |
| 711 | After how many days did you seek care the first time?<br><i>Write number of days from the onset of illness, if first day of illness write 0. If possible use the medical record to confirm</i>                                                | _               |
| 712 | <b>If yes to any of the symptoms 691-704:</b><br>At any time during the illness, did [NAME] take any drugs for the illness?<br><i>(1)yes (2)no - end</i>                                                                                      | _               |
|     | What drugs did [NAME] take? <i>Select all that apply</i>                                                                                                                                                                                      | (1)yes<br>(2)no |
| 713 | malaria drugs: SP/Fansidar                                                                                                                                                                                                                    | _               |
| 714 | malaria drugs: Chloroquine                                                                                                                                                                                                                    | _               |
| 715 | Antibiotic: gentamycin                                                                                                                                                                                                                        | _               |
| 716 | Antibiotic: ampicillin                                                                                                                                                                                                                        | _               |
| 717 | Tetracycline /other eye ointment                                                                                                                                                                                                              | _               |
| 718 | ORS                                                                                                                                                                                                                                           | _               |
| 719 | Vitamin A                                                                                                                                                                                                                                     | _               |
| 720 | Traditional remedy                                                                                                                                                                                                                            | _               |
| 721 | Herbs                                                                                                                                                                                                                                         | _               |
| 722 | For how many days did [NAME] take the drugs<br><i>Write number of days</i>                                                                                                                                                                    | _               |

**End – thank the participant for their time.**

**Check whether there is another woman aged 13-49 in the house.**
